# Supplementary material for: Risk factors of local control in adrenal metastases treated by stereotactic body radiation therapy - a systematic review and meta-analysis
Source: Front Oncol. 2023 Nov 17;13:1193574. doi: 10.3389/fonc.2023.1193574 (PMC10691549; doi:10.3389/fonc.2023.1193574)
Supplement: Supplementary file 2 [file Table_1.xlsx]

## Sheet: Table A
Table A Individual study level characteristics.
Author	Year	Patients,n	lesions,n	age,y(r)	Male,n(%)	Female,n(%)	Right,n(%)	Left,n(%)	Bilateral,n(%)	Concurrent therapy,n(%)	follow-up time,m(r)	OS,m(r)	LRFS,m(r)	PFS,m(r)	the time from primary diagnosis to adrenal metastases，m(r)	primary site	SCLC,n(%)	Oligometastatic or oligoprogressive,n(%)	Melanoma,n(%)	Solitary,n(%)	Synchronous,n(%)	Metachronous	tumor size,cm(r)	PTV,cc(r)	GTV,cc(r)	Dose,Gy(r)	fractions,n(r)	dose/fraction,Gy(r)，median	BED10,Gy(r)	Trackinga,n(%)	4D-CT,n(%)	CTV/ITV-PTV，mm	precription isodose line，%	Grade1,n(%)	Grade2,n(%)	Grade3+a,n(%)	adrenal insufficiency
A. Baydoun	2021	47	57	65.8(55-76.8)	25(53.2）	22(46.8）	NR	NR	10(21.28)	NR	18.2(2-67）	19.1	15.3	5.3	NR	lung34(72.3);colorectal3(6.4);liver(2.1);kidney4(8.5);prostate1(2.1);stomach1(2.1),unknown2(4.3)	4(8.5）	37(78.7)	1(2.1）	26(55.3)	21(44.7)	26(55.3)	NR	71.7(51.6)	25.8(28.9)	35(24-50）	5(3-10）	7	69.4(19.8)	6(12.70)	40(70.2)	NR	89(83-94)	0	0	1(2.1)	0
Alfred Haidenberger	2017	23	24	63.5(43-85)	15(65.2)	8(34.8)	16(66.7)	8(33.3)	1(4.35)	NR	23.6(1.7-71.5）	29.2	19	NR	NR	lung11(47.8);kidney7(30.4);liver(4.3);breast1(4.3);pancreas1(4.3);unknown1(4.3)	2(8.7)	NR	1(4.3)	NR	NR	NR	NR	(4.9-95.9)	48.6(4.9-95.9)	22(20-45）	1(1-3）	22	70.4	23(100)	23(100)	4mm	70(60-70)	5(21.74)		0	0
Buergy	2021	326	366	64.8(54.3-75.3)	208(63.8)	118(36.2)	NR	NR	40(12.27)	12(3.68)	11.7	NC	NC	NC	9.8(0.2-21.9)	lung224(68.8);colorectal14(4.3);HCC/CCC11(3.4);other55(16.9)	53(16.3)	141(43.3)	22(6.7)	107(32.8)	NR	NR	NR	64.4(39.4-116.5)	24.8(12.6-51.3)	20-60	5-15	3-8	64.2(45.3-83.1)	6(1.80)	241(65.8)	NR	98	NR	15(4.6)nausea and vomiting;32(9.8)fitigue	1(0.03)	4
Ciro Franzese	2021	142	149	69.9(26.7-87.1）	99(69.72）	43(30.28）	72(48.32）	77(51.68）	17(12.0）	27(19.01）	14.4(3-100)	NR	NR	NC	16.3(0-246.9）	lung83(58.5);colorectal13(9.15);kidney13(9.15);Skin10(7.04);liver8(5.63);other15(10.58)	NR	98(69)	10(7.04）	42(29.58）	NC	NC	NR	NC	28.5(2.5-323.4）	40(10-60）	4(1-10）	8(4-30）	78.75(20-120）	0	142(100)	5-7mm	NR	21(14.7)	3(2.1)	1(1.05)	0
Claire van Vliet	2022	51	54	65(42-89）	37(72）	14(28）	22(41）	32(59）	3(5.88)	6(11）	16.9	NR	NR	NR	NR	lung40(75);Kidney4(7);cocorectal4(7);liver3(6);esophagea1(2);other2(4)	3(6）	53(98)	NR	23(43)	9(17)	24(44)	2.9(1.3-6.6)	NR	NR	50	5	10	100	0	51(100)	3mm	NR	31(61)		1(2.0)	0
Corbin A. Helis	2020	27	29	63(54.4-69.1)	14(53.6)	13(46.4)	13(44.8）	16(53.6）	2(7.4)	11(37.9）	32.9(8.8-not reached）	22.8(15.4-not reached）	NR	5.7(3.9-14.3）	NR	lung21(72.4);liver7(24.1);germ cell1(3.4)	1(3.4)	26(89.7)	0	NR	16(59.3)	11(40.7)	2.9(2.6-4.1)	51.9(35.2-96.1）	14.3(6.7-49.9）	50(30-54）	10(5-10）	5(4-9）	75(48-102.6)	no routingly	27(100)	5mm	84(80-95.8）	NR	acute9(31);late1(3.4)	2(6.8)	3(11.5)
Cyrielle Scouarnec	2019	31	33	63(38-80)	20(64.5)	11(35.5)	16(48.5）	17(51.5）	2(6.45)	NR	18(4.4-66.4)	33.5(17-no reached)	14(8.8-49.4）	4.5(0.6-86.2）	16.35(5-130.5)	lung14(45.2);kidney3(9.7);Breast3(9.7);liver1(3.2);stomach1(3.2);bladder1(3.2);esophagus1(3.2);merkel cell(3.2)	NC	31(100）	6(19.4）	8(24.2)	5(15.2)	26(84.8)	3.3(1.4-10.3)	NR	13.1(0.9-278.7）	45(30-55）	3(3-9）	15(5-15）	112.5(45-115.5）	28(90.3）	31(100）	3-5mm	83(62-90）	13(42.4）		0	0
Diego A.S. Toesca	2018	35	39	66(45-85)	21(60)	14(40)	18(46)	21(54)	4(11.43)	NR	7(1-54）	19(8-54）	6(6-43）	NR	24(2-407）	lung17(48)；liver7(20);gastrointestinal3(9);kidney2(6);other6(17)	NC	35(100）	NC	10(29)	7(20)	28(80)	2.9(0.7-9)	50.5(7.9-352.9)	19(1.3-213.2)	40(20-54）	5(1-6）	8	72(30-124.8)	16(45.7）	35(100）	2-3mm	95	NR	6(17）	0	1
EREN CELIK	2016	15	15	70(54-84)	8(53)	7(47)	NR	NR	0	NR	24(8-48）	17.3	11	10.5	NR	NR	0	15(100）	0	9(60)	6(40）	9(60）	NR	74.4(37.4-137.2)	36.1(111.1-88.4)	42	6	7	71.4	15(100）	15(100）	4mm	68.7(65-73)	0	3(20）	0	0
Fabio Arcidiacono	2020	37	38	67(43-83)	27(72.97)	10(27.02)	13(34）	25(66）	1(2.7)	12(32.43）	10.5(4-100)	16(9-28）	7(4-32)	3(2-5)	14(0-108)	lung37(100)	10(27）	37(100）	0	23(72）	14(37）	24(63）	NR	43.5	16(0.91-123）	30(30-50）	5	6(6-10）	48(48-100）	0	37(100)	5mm	95	7(19)		0	0
Facondo	2021	24	25	73(45-91）	15(62）	9(38）	7(28）	18(72）	1(4.17)	4(17)	9(1-101)	35(8-171)	NR	NR	10(0-78)	lung17(71);kidney3(12);gastrointestinal2(3);endometrial1(4)	4(17)	24(100）	1(4)	NR	7(29)	17(71)	NR	41.7(5.1-177)	13.9(1.5-95.4)	36(10-60)	3(1-18)	10(3-30)	76.8(48-151.2)	0	24(100)	3mm	95	8(32）		4(16)	0
Felix Ehret	2022	55	72	66.3(43.8-85.3）	39(71）	16(29）	40(56）	32(44）	17(30.9)	38(53)	16.4(0.2-107.1）	NR	NR	8.2	NR	lung23(42)；kidney21(38);other11(20)	4(7）	NR	NR	22(40)	NR	NR	NR	38.3(4.9-95.9）	16.8(2.1-71.6）	24(19-45）	1(1-5）	24	80.4(43.2-112.5）	54(98.18）	55(100)	5mm	70(60-70）	9(16)		0	4(3happen after surgical contralateral)
FRANCO CASAMASSIMA	2012	48	58	62.7(43-77)	30(62.5)	18(37.5)	33(57)	25(43)	10(20.8)	NR	16.2(3-63)	NR	4.9	NR	37.2(1-132)	lung24(50);colon12(25);breast3(6.3);kidney3(6.3);uterus1(2),unknown1(2)	NR	NR	4(8.4)	NR	NR	NR	NR	NR	103.4(6.6-497)	36	3	12	79.2	0	48(100)	3mm	70(60-70）	0	1(2)	0	1
Hakan Gamsiz	2015	15	17	56(42-69)	9(60)	6(40)	11(64.7)	6(35.3)	2(13.3)	0	16	(4-26)	NR	10	NR	NR	0	15(100)	0	8(53.3)	NR	NR	NR	57.4(16.5-143.8)	28.4(6.6-101.5)	30	3	10	60	0	15(100)	3-5mm	90-100	12(80)	1(8.3)	0	0
Jordan Torok	2011	7	9	60(NR)	3(42.86）	4(57.14)	NR	NR	2(28.57）	NR	14(1-60)	8	12	NR	8(0-28）	lung5(71.43);liver2(28.57)	1(14.28)	NR	0	NR	NR	NR	NR	NR	63.8(5.0-123.6)	16(10-36)	1(1-3)	16	46.8	5(71.43）	2(28.57）	0-2mm	94(80-94)	0	0	0	0
Kamran A. Ahmed	2013	13	13	71(60.8-83.2)	8(61.54)	5(38.46)	4(30.77)	9(69.23)	0	NR	12.3(3.1-18)	8.1(2.1-18)	NR	2.5(1-15.2)	47(6-84)	lung6(46.15);kidney2(15.38);skin2(15.38);liver1(7.69);colon1(7.69);bladder(7.69)	1(7.69)	Nr	1(7.69)	NR	NR	Nr	NR	88.4(19.9-379.6)	NR	45(33.8-60)	5	9(6.75-12)	85.5	0	13(100)	5mm	NR	acute6(46.16);late1(11.54)	acute3(23.08);late3(23.08)	0	0
Kim Burjakow	2018	33	38	63.3(29-86）	23(69.7）	10(30.3)	18(47.37)	20(52.63)	5(15.15)	NR	11(0-51）	11(2.03-19.97)	21(6.56-35.44）	4(0.84-7.15)	NR	lung19(57.58);esophagus2(6.06);liver1(3.03);skin8(24.24);colon1(3.03);rectum1(3.03);breast1(3.03)	2(6.06）	NR	8(24.2）	NR	NR	NR	NR	81.47(35.76-258.1)	24.15(8.37-133.44)	48(28-68)	NR	4(2-6)	67.2(42-108.8)	0	33(100)	5mm	90	7(25)	0	0	0
Kristin Plichta	2017	10	10	66(36-79)	4(40)	6(60)	NR	NR	0	0	6(1-34)	9.9	NR	3.4	18.8(0-74)	lung6(60);esophagus1(10);leiomyosarcoma1(10);liver1(10)	2(20)	10(100)	0	NR	NR	NR	NR	NR	31.4(3.88-104)	35(30-48)	3(3-5)	10(6-15)	60(48-112.5)	0	10(100)	5mm	NR	8(72.8)		1(9.1)	0
Laila König	2020	28	28	63(48-91)	21(75)	7(25)	14(50）	14(50）	0	9(32.1)	9.8(3.1-83.9）	NR	7.6(7-8.2)	NR	14(0-102)	lung18(64.3);kidney2(7);colon1(3.6);liver1(3.6);breast1(3.6);other4(14.3)	5(17.9)	28(100)	1(3.6)	17(60.7）	10(35.7）	18(64.3）	NR	111(16-346）	42(3-233）	50(30-54）	10(3-12）	5(4-18）	75(57.6-151.2）	0	24(85.71)	7mm	90(80-90)	acute:9(28);late3(10.3)		0	0
Leonid B. Reshko	2021	23	26	66(42-79)	NR	NR	13(50)	13(50)	3(13.04)	NR	12(7-20)	20(3-44)	11.6(3-43.7)	18(6-36)	31(1-184)	lung13(56.5);esophagus1(4.35);ovary1(4.35);skin3(13.04);colon3(13.04);breast2(8.7)kidney1(4.35);occult1(4.35）	2(8.7)	23(100)	1(4.34)	20(86.96)	NR	NR	NR	38.3	12.11(1.728-87.57）	36(24-50)	3(3-6)	12	72(40-100)	2(8.70)	23(100)	5mm	70-80	6(26.09)	1(4.34)	0	1(4.34)
Marta Scorsetti	2012	34	36	67(27-86）	30(88）	4(12）	19(52.8）	17(47.2）	2(5.88)	NR	41(12-75）	22.8	19.7	10.3	12.5(0-95）	lung26(74);skin3(7);esophagus1(7);hepatic duct1(3);colorectal1(3);kidney1(3);unkown1(3)	3(7）	34(100)	3(7)	22(64.71)	NR	NR	NR	NR	43.97	32(20-45）	4(4-18）	3-5	43.15(30-56.3）	0	34(100)	5mm	95	NR	2(6)	0	NR
Michael Guiou	2012	9	11	59.2(49.9-68.5)	5(55.56)	4(44.44)	NR	NR	2(22.22）	7(77.78)	7.3(0-26)	10.2	NR	NR	NR	lung9(100)	5(55.56)	5(55.56）	0	NR	5(50)	5(50)	NR	306.62(127.5-953.6)	163(22.3-599.7)	25(20-37.5)	5	5(4-7.5)	37.5(28-65.5)	0	9(100)	5mm	95	NR	2(22.22)	0	0
Nicholas B. Figura	2020	41	45	60(40-80）	31(76）	10(24）	19(42.22)	26(57.78)	3(7.32)	8(19.51)	10.5	27.9	NR	10.2	10.2	lung22(53.7);kidney10(24);colorectal1(2);liver1(2);sinus1(2);skin1(2)	4(10）	41(100)	1(2)	NR	8(27)	22(73)	NR	31.7(5.2-175.9)	21.2(3.1-124.7)	50(25-60)	5	10(5-12)	100	0	41(100)	NR	NR	NR	NR	1(2.4)	0
Norio Katoh	2018	20	21	66(48-86)	19(95)	1(5)	12(57.1）	9(42.9）	1(5)	NR	17.5	NR	NR	NR	NR	lung9(45);liver5(25);kidney4(20);bladder1(5),prostate1(5)	1(5）	20(100）	0	NR	14(70)	6(30)	≈4.7(1.9-8.0)	137.9	49.8	48(40-70)	8(5-10)	6	76.8	13(65)	7(35)	2-5mm	NR	NR	4(19.05)	0	0
Shah	2019	44	54	61.3(25.8-85）	25(56.8）	19(43.2）	19(35.2）	35(64.8）	3(6.8)	NR	5.4(0.9-44.8)	6.7(0.4-51.9)	NR	NR	NR	lung30(68.18);liver6(13.64);Beast1(2.3);cecal1(2.3);skin1(2.3);nerve sheath sarcoma1(2.3);cholangiocarcinoma1(2.3);renal1(2.3);pancreases1(2.3);	1(2.3）	NR	1(2.3)	16(36.4）	NR	NR	NR	49.65(3.21-984.54）	27.12(0.693-984.54）	30(14-40）	5(1-6）	7(4-18）	48	0	44(100)	0-6mm	95	NR	NR	0	NR
SHEEMA CHAWLA	2009	30	35	61.8(NR）	14(46.67)	16(53.33)	19(54.29)	16(45.71)	5(16.67)	NR	(0.8-35)	19(10-35)	9.5(1.4-18.3)	NR	8.4(0-101.4)	lung20(66.67);liver3(10);breast3(10);pancreas1(3.3);skin1(3.3);head and neck1(3.3),unkonwn1(3.3)	NR	NR	1(3.3)	15(50)	6(20)	24(80)	NR	NR	18.6(7.5-156)	40(16-50)	10(4-16)	4(2.75-6)	56	0	30(100)	7-10mm	80	common nausea	0	0	0
Sonali Rudra	2013	10	13	58(43-74）	NR	NR	NR	NR	3(30)	NR	14.9(5-45.8）	17.3	3.4(1-35.8）	NR	NR	lung8(80)，kidney2(20)	2(20）	10(100）	0	NR	NR	NR	4.1(2.1-7.7）	NR	19.2(6.4-131.0）	36(24-50)	3	8(8-12）	60(43.2-79.2)	0	10(100)	5-10mm	80-90	≥7(70）	1(10）	0	1
Theresa Voglhuber	2020	31	34	66.1(26.7-82.2）	17(54.8）	14(45.2）	16(47.06)	18(52.94)	3(9.7)	NR	9.8(0-120.5）	18.7(8.1-29.2)	NR	2.3(1.0-3.6)	12.3(0-169)	lung13(41.9);Breast 6(19.4);skin4(12.9);other8(25.8)	NR	28(90)	4(12.9)	6(19.4）	15(48.4）	19(61.3）	NR	76.8(24.1-434.8)	22.3	35(12-40)	5(3-14)	7(3-8)	59.5	0	part required	NR	60-80	most common:acute fatigue6(19.4);late gastrointestinal4(12.9)	most common:acute 5(16.1);late3(9.7)	0	2
William W. Chance	2017	43	49	64(43-77)	33(76.74)	10(23.26)	21(42.86)	28(57.14)	6(14)	NR	16(3-94)	19	(4-21)	6	12(1-133)	lung36(84);ovary2(4.65);esophagus2(6.5);bladder1(3.25);breast1(3.25);skin1(3.25)	NR	43(100)	0	15(35)	20(47)	23(53)	NR	41(11-262）	13(3-90)	60(40-70)	10(4-15)	6(4-12.5)	96	0	43(100)	3-5mm	95	7(16.28)	3(6.98)	0	3
Amishi Desai	2015	14	14	65(49-91）	9(64.29)	5(35.71)	NR	NR	0	0	5.5(0-38)	11(1-no reach)	(0-38+)	NR	14(8-56)	lung6(42.86);kidney(14.29);skin1(7.14);adrenal1(7.14);mullerian1(7.14);GEjunction1(7.14),bladder1(7.14);lymphoma1(7.14)	0	12(85.71)	1(7.14)	NR	NR	NR	NR	NR	NR	25(13-30)	3(1-5)	7.5(4-13)	40.1(28-60)	14(100)	NR	NR	NR	NR	NR	0	0
Richard Holy	2011	18	18	61.5(NR)	17(94.44)	1(5.5)	NR	NR	NR	NR	21	21	NR	4.2	NR	NR	0	＞13(72.77)	0	13(72.22)	NR	NR	NR	176(20-422)	NR	36(15-40)	5(3-12)	7(3-8)	72	0	18(100)	5-10mm	100	NR	0	2(11.11)	0
Xianzhi Zhao	2020	75	84	58(27-85)	61(81.33)	14(18.67)	40(47.62)	44(52.38)	9(12)	NR	12.7(1.8-96.4)	23(15.4-30.6)	NR	5.8(4.4-7.2)	NR	lung30(40);liver20(26.7);kidney7(9.3);colorectum5(6.7);lymphoma4(5.3);stomach2(2.7);esophagus2(2.7);pancreas2(2.7);adrenal1(1.3);nasopharynx1(1.3);breast1(1.3)	NR	NR	NR	37(49.33)	NR	NR	NR	NR	24.8(0.25-309.3)	42(32-52)	5(3-10)	8(3.65-15)	79.6(44.8-112.5)	75(100)	75(100)	3-7mm	72(61-85)	0	0	2(2.7)	0
Aysenur Elmali	2022	124	146	60(55-66）	89(72）	35(28）	66(45.2)	80(54.8)	22(17.7)	NR	8(1-124)	14.6(10.88-18.32)	10.37(8.27-12.46)	5.9(4.46-7.34)	NR	lung94(76);breast7(6);gastrointestinal system10(8);Renal4(3);other9(7)	19(15)	NC	NR	49(40)	NC	NR	2.6(0.7-6.9)	125(1.6-1906.32)	31.25(0.4-476.58)	36(15-60)	4(3-10)	8	65(28-180)	NR	124(100)	5-7mm	0.95	14(11)		3(2)	2
Total	2009-2022	1483	1660	64(25.8-91)	976(67.31)	474(32.69)	541(47.17)	606(52.83)	179(11.16)	134(23.34)	13.35(0-124）	19(0.4-171）	11(0-49.4）	5.75(0.6-86.2）	14(0-407）	lung915(60.64)	129(11.34)	779(90.55)	67(4.51)	488(46.70)	163(37.35)	282(60.69)	2.9(0.7-10.3)	64.4(1.6-1906.32)	24.8(0.25-984.54)	36(10-70）	4.5(1-18）	7.5(2-30）	71.4(20-180)	257(19.29)	1324(93.07)	0-10mm	60-100			12(1.316)	20(1.98)
a Tracking and toxicity response rate were caculated by patients number.
SCLC: small cell lung cancer; PTV:planning target volume; GTV:gross tumor volume; ITV: internal target volume.
NR: no report; NC: no clear.
